# Supplementary material
Source: PubMed Central journal article supplement (PMC4469560)

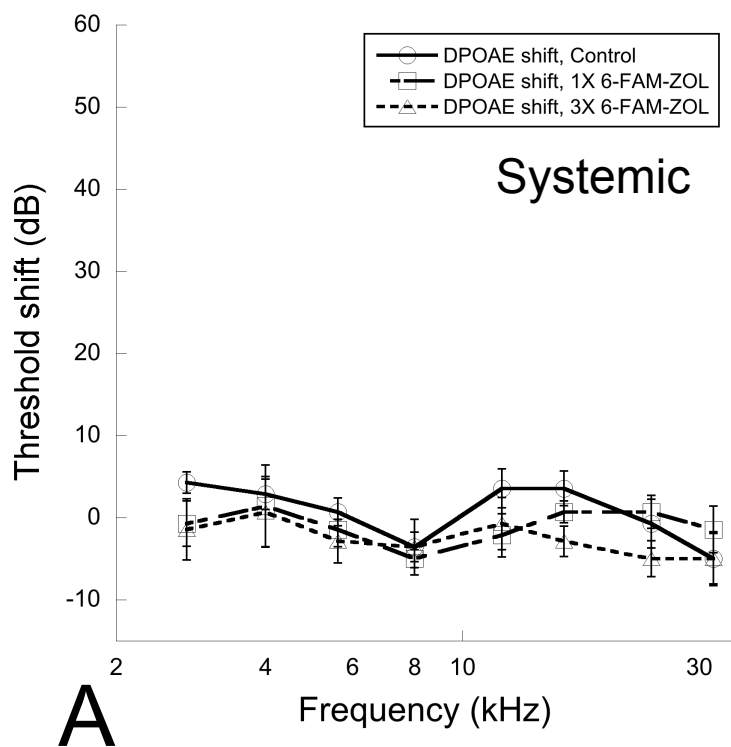**A**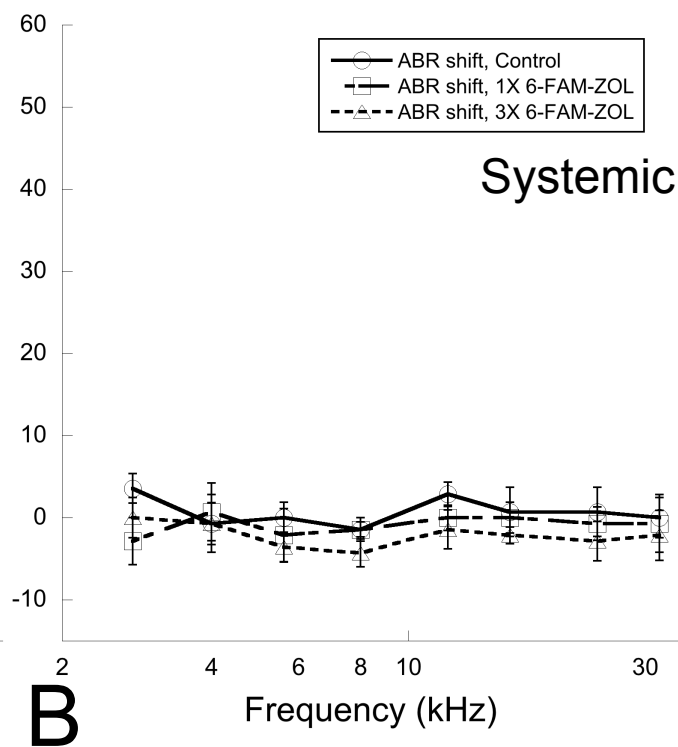**B**

Supplement: NIHMS681543-supplement-Supplemental_Digital_Content_1.pdf [file NIHMS681543-supplement-Supplemental_Digital_Content_1.pdf]

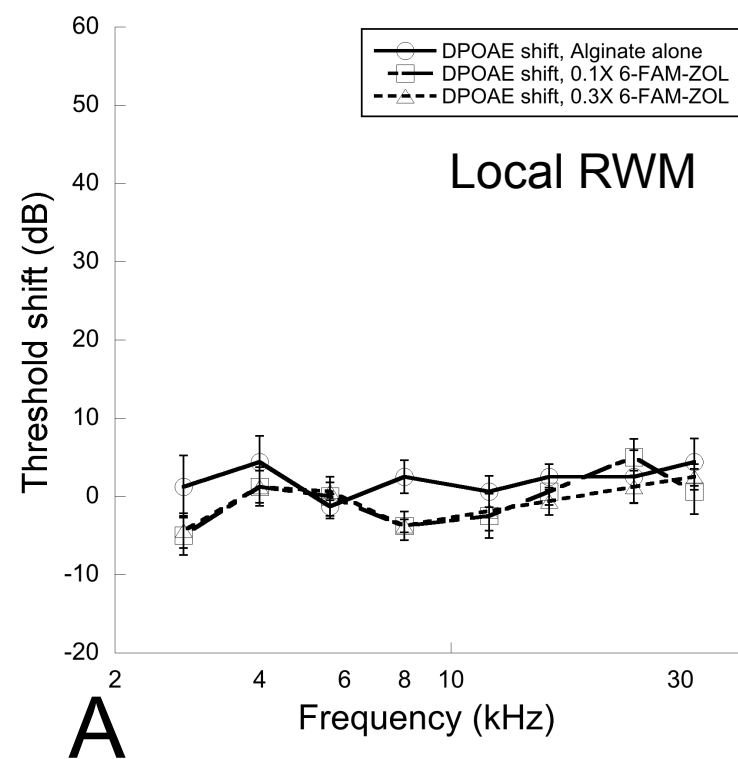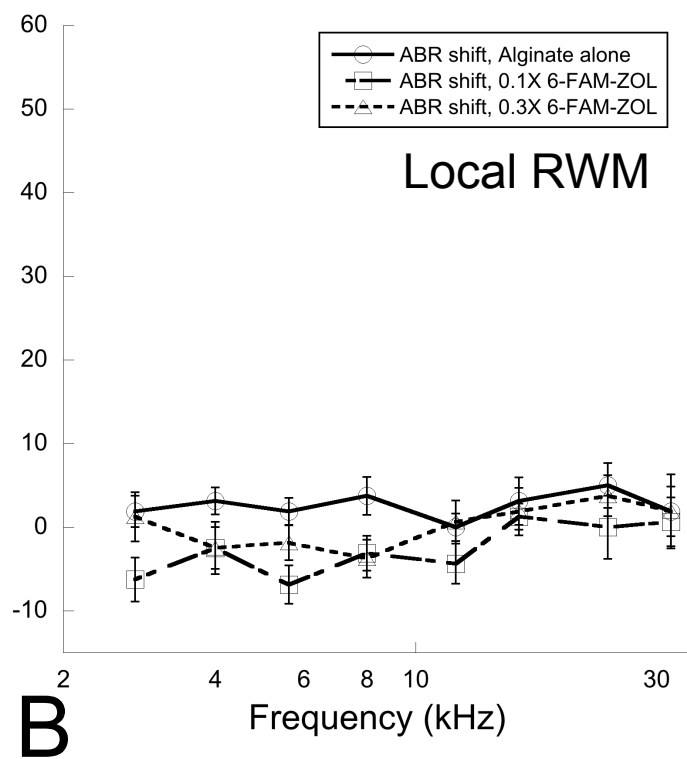

Supplement: NIHMS681543-supplement-Supplemental_Digital_Content_2.pdf [file NIHMS681543-supplement-Supplemental_Digital_Content_2.pdf]

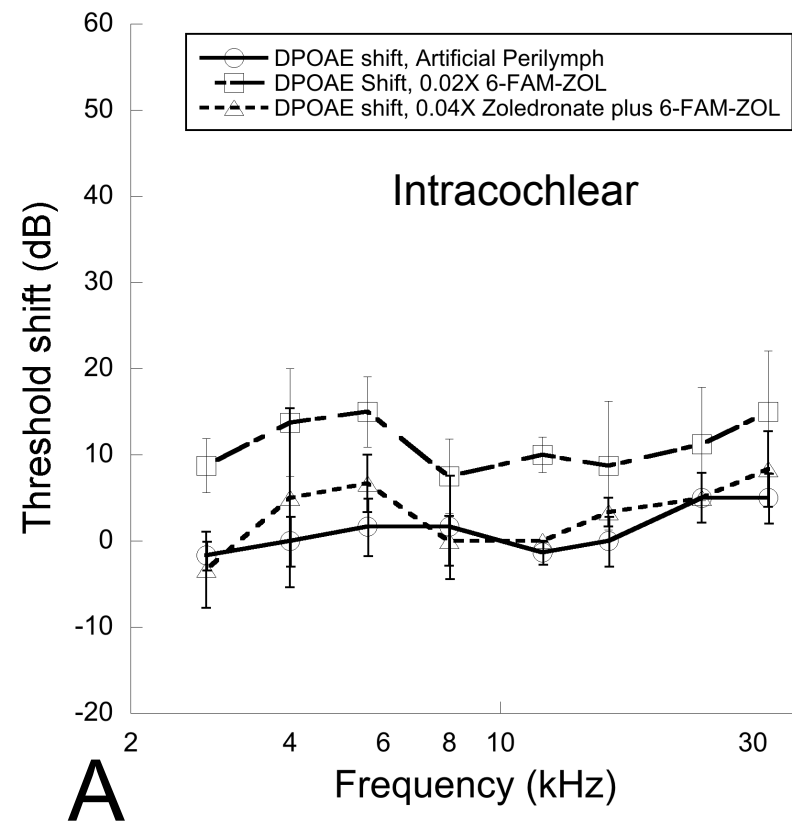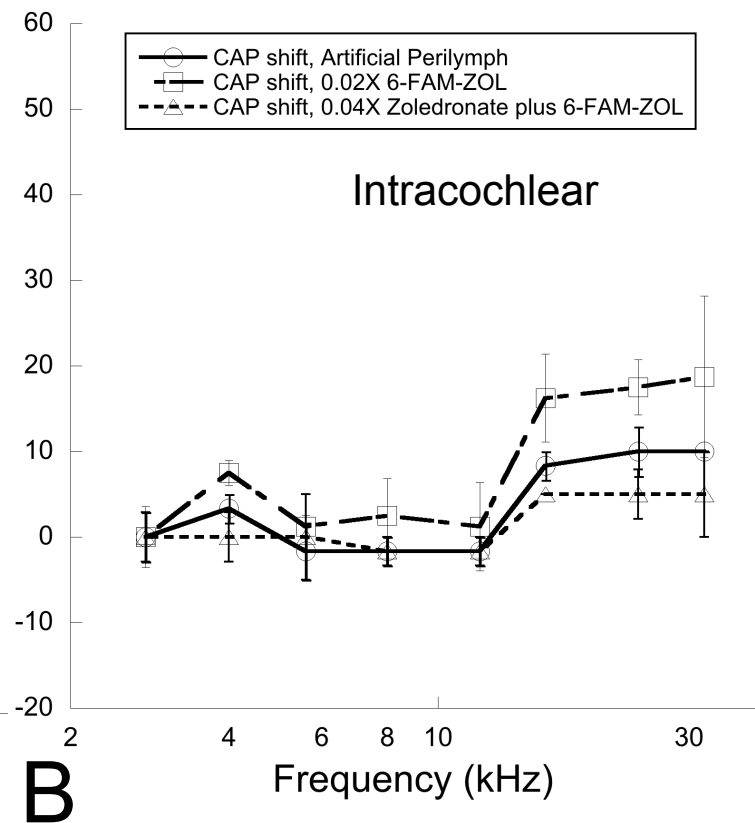

Supplement: NIHMS681543-supplement-Supplemental_Digital_Content_3.pdf [file NIHMS681543-supplement-Supplemental_Digital_Content_3.pdf]
